# Supplementary material for: Catalytic Reductive Degradation of Methyl Orange Using Air Resilient Copper Nanostructures
Source: Hindawi journal article supplement (doi:10.1155/2015/136164), 2015-01-01
Supplement: f1 [file 136164.f1.pdf]

## Supplementary Data

### Catalytic Reductive Degradation of Methyl Orange Using Air Resilient Copper Nanostructures

**Fig. S1**

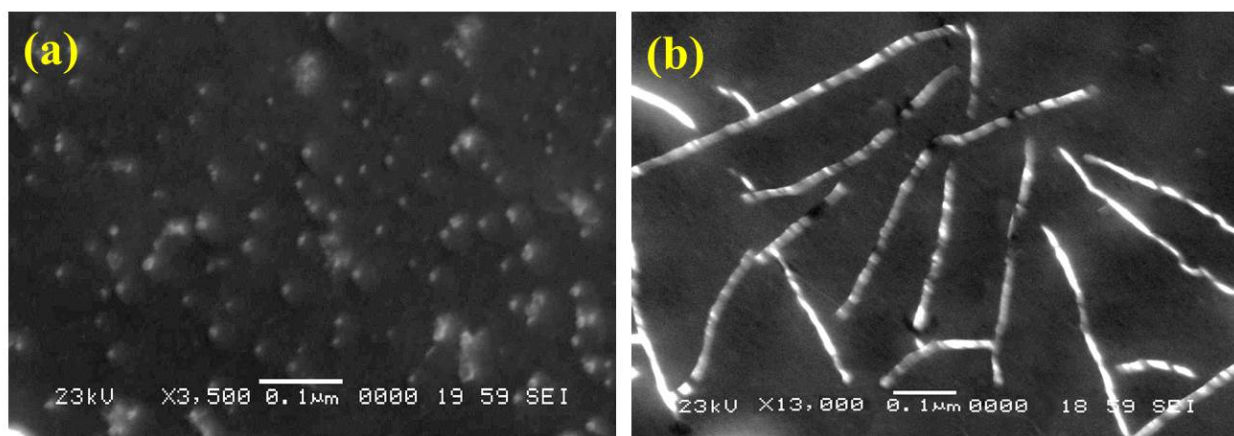

**Fig. S1 SEM images for (a) SDS capped Cu NPs and CTAB capped Cu NRs**

**Fig. S2**

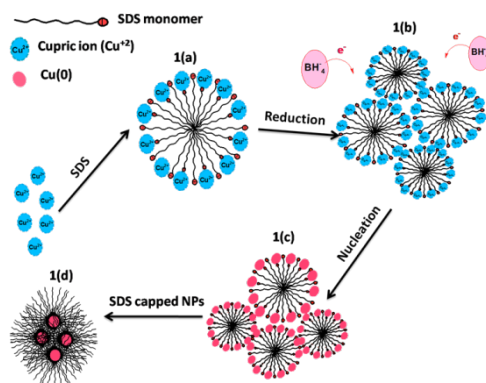

**Fig. S2** Formation of Cu NPs in SDS rich aqueous medium.

**Fig. S3**

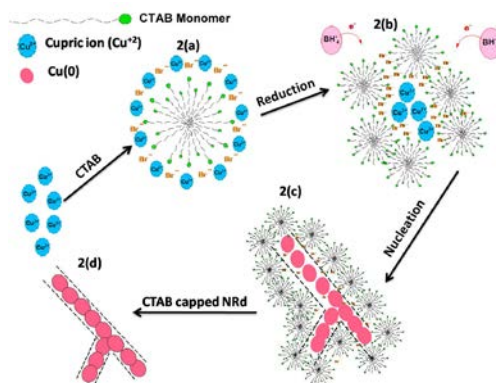

**Fig. S3** Formation of Cu NRds in CTAB rich aqueous medium

**Fig. S4**

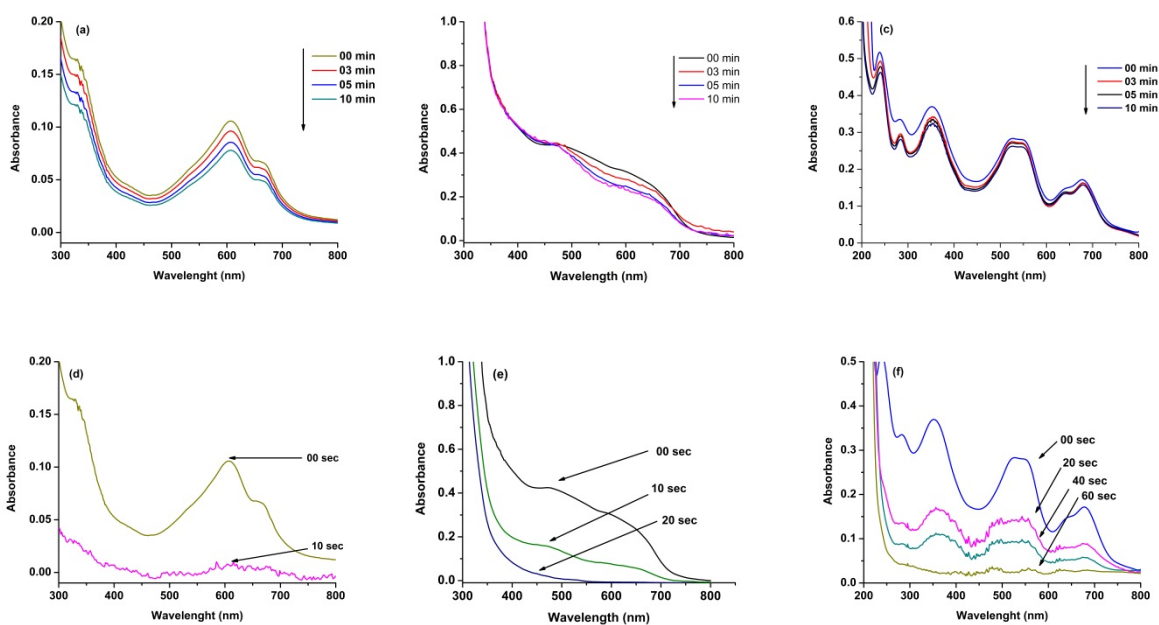

**Fig. S4** UV-Vis spectra for the reductive degradation of real samples (a, b, c) un-catalyzed reduction of 10  $\mu\text{l}$  real sample diluted up to 03 ml in presence of 100 mM ( $\text{NaBH}_4$ ) reductant; (d, e, f) catalyzed reductive degradation of similar samples with 0.5 mg of Cu NPs.
